# Supplementary material for: Antioxidant Activity and Phytochemical Constituents of Pawpaw (Carica Papaya) During Ripening
Source: Research Square preprint supplement (doi:10.21203/rs.3.rs-4947309/v1), 2024-09-30
Supplement: Supplementary file 1 [file da9eac9286d3f5bf32c2d782.docx]

**APPENDIX I**

**Table 3:** Correlation matrix for Antioxidant activity and Phytochemical constituents in *Carica papaya* fruit (pear-shaped variety: Local pawpaw) at the Unripe stage

| Correlation matrix for Antioxidant activity and Phytochemical constituents (Pear-shaped variety) Local Pawpaw | | Antioxidant (Pear-shaped variety) Local Pawpaw | Tannins (Pear-shaped variety) Local Pawpaw | Flavonoids (Pear-shaped variety) Local Pawpaw | Phenol (Pear-shaped variety) Local Pawpaw | Saponins (Pear-shaped variety) Local Pawpaw | Alkaloids (Pear-shaped variety) Local Pawpaw |
| --- | --- | --- | --- | --- | --- | --- | --- |
| Antioxidant (Pear-shaped variety) Local Pawpaw | Pearson Correlation | 1 | -.738 | .350 | -.240 | -.856 | -1.000** |
| Sig. (2-tailed) |  | .472 | .772 | .846 | .346 | .000 |
| N | 4 | 3 | 3 | 3 | 3 | 3 |
| Tannins (Pear-shaped variety) Local Pawpaw | Pearson Correlation | -.738 | 1 | .374 | -.478 | .282 | .738 |
| Sig. (2-tailed) | .472 |  | .756 | .683 | .818 | .472 |
| N | 3 | 3 | 3 | 3 | 3 | 3 |
| Flavonoids (Pear-shaped variety) Local Pawpaw | Pearson Correlation | .350 | .374 | 1 | -.993 | -.784 | -.350 |
| Sig. (2-tailed) | .772 | .756 |  | .073 | .426 | .772 |
| N | 3 | 3 | 3 | 3 | 3 | 3 |
| Phenol (Pear-shaped variety) Local Pawpaw | Pearson Correlation | -.240 | -.478 | -.993 | 1 | .708 | .240 |
| Sig. (2-tailed) | .846 | .683 | .073 |  | .499 | .846 |
| N | 3 | 3 | 3 | 3 | 3 | 3 |
| Saponins (Pear-shaped variety) Local Pawpaw | Pearson Correlation | -.856 | .282 | -.784 | .708 | 1 | .856 |
| Sig. (2-tailed) | .346 | .818 | .426 | .499 |  | .346 |
| N | 3 | 3 | 3 | 3 | 3 | 3 |
| Alkaloids (Pear-shaped variety) Local Pawpaw | Pearson Correlation | -1.000** | .738 | -.350 | .240 | .856 | 1 |
| Sig. (2-tailed) | .000 | .472 | .772 | .846 | .346 |  |
| N | 3 | 3 | 3 | 3 | 3 | 3 |
| **. Correlation is significant at the 0.01 level (2-tailed). | | | | | | | |

**Table 4:** Correlation matrix for Antioxidant activity and Phytochemical constituents in *Carica papaya* fruit (pear-shaped variety: Local pawpaw) at the Ripe stage

| Correlation matrix for Antioxidant activity and Phytochemical constituents (Pear-shaped variety) Local Pawpaw | | Antioxidant (Pear-shaped variety) Local Pawpaw | Tannins (Pear-shaped variety) Local Pawpaw | Flavonoids (Pear-shaped variety) Local Pawpaw | Phenol (Pear-shaped variety) Local Pawpaw | Saponins (Pear-shaped variety) Local Pawpaw | Alkaloids (Pear-shaped variety) Local Pawpaw |
| --- | --- | --- | --- | --- | --- | --- | --- |
| Antioxidant (Pear-shaped variety) Local Pawpaw | Pearson Correlation | 1 | -.500 | .977 | .721 | -.159 | .824 |
| Sig. (2-tailed) |  | .667 | .138 | .488 | .898 | .383 |
| N | 4 | 3 | 3 | 3 | 3 | 3 |
| Tannins (Pear-shaped variety) Local Pawpaw | Pearson Correlation | -.500 | 1 | -.302 | .240 | .935 | .078 |
| Sig. (2-tailed) | .667 |  | .805 | .846 | .232 | .950 |
| N | 3 | 3 | 3 | 3 | 3 | 3 |
| Flavonoids (Pear-shaped variety) Local Pawpaw | Pearson Correlation | .977 | -.302 | 1 | .853 | .057 | .927 |
| Sig. (2-tailed) | .138 | .805 |  | .350 | .964 | .245 |
| N | 3 | 3 | 3 | 3 | 3 | 3 |
| Phenol (Pear-shaped variety) Local Pawpaw | Pearson Correlation | .721 | .240 | .853 | 1 | .570 | .987 |
| Sig. (2-tailed) | .488 | .846 | .350 |  | .614 | .104 |
| N | 3 | 3 | 3 | 3 | 3 | 3 |
| Saponins (Pear-shaped variety) Local Pawpaw | Pearson Correlation | -.159 | .935 | .057 | .570 | 1 | .428 |
| Sig. (2-tailed) | .898 | .232 | .964 | .614 |  | .718 |
| N | 3 | 3 | 3 | 3 | 3 | 3 |
| Alkaloids (Pear-shaped variety) Local Pawpaw | Pearson Correlation | .824 | .078 | .927 | .987 | .428 | 1 |
| Sig. (2-tailed) | .383 | .950 | .245 | .104 | .718 |  |
| N | 3 | 3 | 3 | 3 | 3 | 3 |

**Table 5:** Correlation matrix for Antioxidant activity and Phytochemical constituents in *Carica papaya* fruit (pear-shaped variety: Local pawpaw) at the Overripe stage

| Correlation matrix for Antioxidant activity and Phytochemical constituents (Pear-shaped variety) Local Pawpaw | | Antioxidant (Pear-shaped variety) Local Pawpaw | Tannins (Pear-shaped variety) Local Pawpaw | Flavonoids (Pear-shaped variety) Local Pawpaw | Phenol (Pear-shaped variety) Local Pawpaw | Saponins (Pear-shaped variety) Local Pawpaw | Alkaloids (Pear-shaped variety) Local Pawpaw |
| --- | --- | --- | --- | --- | --- | --- | --- |
| Antioxidant (Pear-shaped variety) Local Pawpaw | Pearson Correlation | 1 | .801 | -.847 | .452 | .642 | .636 |
| Sig. (2-tailed) |  | .408 | .357 | .702 | .556 | .562 |
| N | 4 | 3 | 3 | 3 | 3 | 3 |
| Tannins (Pear-shaped variety) Local Pawpaw | Pearson Correlation | .801 | 1 | -.360 | -.172 | .056 | .971 |
| Sig. (2-tailed) | .408 |  | .765 | .890 | .965 | .153 |
| N | 3 | 3 | 3 | 3 | 3 | 3 |
| Flavonoids (Pear-shaped variety) Local Pawpaw | Pearson Correlation | -.847 | -.360 | 1 | -.857 | -.951 | -.127 |
| Sig. (2-tailed) | .357 | .765 |  | .344 | .199 | .919 |
| N | 3 | 3 | 3 | 3 | 3 | 3 |
| Phenol (Pear-shaped variety) Local Pawpaw | Pearson Correlation | .452 | -.172 | -.857 | 1 | .974 | -.402 |
| Sig. (2-tailed) | .702 | .890 | .344 |  | .145 | .737 |
| N | 3 | 3 | 3 | 3 | 3 | 3 |
| Saponins (Pear-shaped variety) Local Pawpaw | Pearson Correlation | .642 | .056 | -.951 | .974 | 1 | -.184 |
| Sig. (2-tailed) | .556 | .965 | .199 | .145 |  | .882 |
| N | 3 | 3 | 3 | 3 | 3 | 3 |
| Alkaloids (Pear-shaped variety) Local Pawpaw | Pearson Correlation | .636 | .971 | -.127 | -.402 | -.184 | 1 |
| Sig. (2-tailed) | .562 | .153 | .919 | .737 | .882 |  |
| N | 3 | 3 | 3 | 3 | 3 | 3 |

**Table 6:** Correlation matrix for Antioxidant activity and Phytochemical constituents in *Carica papaya* fruit (pear-shaped variety: Local pawpaw) at various ripening stages (unripe, ripe and overripe)

| Correlation matrix for Antioxidant activity and Phytochemical constituents (Pear-shaped variety) Local Pawpaw | | Antioxidant (Pear-shaped variety) Local Pawpaw | Tannins (Pear-shaped variety) Local Pawpaw | Flavonoids (Pear-shaped variety) Local Pawpaw | Phenols (Pear-shaped variety) Local Pawpaw | Saponins (Pear-shaped variety) Local Pawpaw | Alkaloids (Pear-shaped variety) Local Pawpaw |
| --- | --- | --- | --- | --- | --- | --- | --- |
| Antioxidant (Pear-shaped variety) Local Pawpaw | Pearson Correlation | 1 | -.950** | .916** | .661 | .974** | .911** |
| Sig. (2-tailed) |  | .000 | .001 | .053 | .000 | .001 |
| N | 12 | 9 | 9 | 9 | 9 | 9 |
| Tannins (Pear-shaped variety) Local Pawpaw | Pearson Correlation | -.950** | 1 | -.907** | -.602 | -.976** | -.749* |
| Sig. (2-tailed) | .000 |  | .001 | .086 | .000 | .020 |
| N | 9 | 9 | 9 | 9 | 9 | 9 |
| Flavonoids (Pear-shaped variety) Local Pawpaw | Pearson Correlation | .916** | -.907** | 1 | .426 | .894** | .819** |
| Sig. (2-tailed) | .001 | .001 |  | .253 | .001 | .007 |
| N | 9 | 9 | 9 | 9 | 9 | 9 |
| Phenols (Pear-shaped variety) Local Pawpaw | Pearson Correlation | .661 | -.602 | .426 | 1 | .665 | .673* |
| Sig. (2-tailed) | .053 | .086 | .253 |  | .050 | .047 |
| N | 9 | 9 | 9 | 9 | 9 | 9 |
| Saponins (Pear-shaped variety) Local Pawpaw | Pearson Correlation | .974** | -.976** | .894** | .665 | 1 | .813** |
| Sig. (2-tailed) | .000 | .000 | .001 | .050 |  | .008 |
| N | 9 | 9 | 9 | 9 | 9 | 9 |
| Alkaloids (Pear-shaped variety) Local Pawpaw | Pearson Correlation | .911** | -.749* | .819** | .673* | .813** | 1 |
| Sig. (2-tailed) | .001 | .020 | .007 | .047 | .008 |  |
| N | 9 | 9 | 9 | 9 | 9 | 9 |
| **. Correlation is significant at the 0.01 level (2-tailed). | | | | | | | |
| **Table 7:** Correlation matrix for Antioxidant activity and Phytochemical constituents in *Carica papaya* fruit (oblong variety: Agric Pawpaw ) at the Unripe stage   | Correlation matrix for Antioxidant activity and Phytochemical constituents (Oblong variety)  Agric Pawpaw | | Antioxidant (Oblong variety) Agric Pawpaw | Tannins (Oblong variety) Agric Pawpaw | Flavonoids (Oblong variety) Agric Pawpaw | Phenol (Oblong variety) Agric Pawpaw | Saponins (Oblong variety) Agric Pawpaw | Alkaloids (Oblong variety) Agric Pawpaw | | --- | --- | --- | --- | --- | --- | --- | --- | | Antioxidant (Oblong variety) Agric Pawpaw | Pearson Correlation | 1 | .707 | -.062 | .442 | .635 | .988 | | Sig. (2-tailed) |  | .500 | .960 | .708 | .562 | .099 | | N | 4 | 3 | 3 | 3 | 3 | 3 | | Tannins (Oblong variety) Agric Pawpaw | Pearson Correlation | .707 | 1 | -.750 | .947 | .995 | .808 | | Sig. (2-tailed) | .500 |  | .460 | .208 | .062 | .401 | | N | 3 | 3 | 3 | 3 | 3 | 3 | | Flavonoids (Oblong variety) Agric Pawpaw | Pearson Correlation | -.062 | -.750 | 1 | -.923 | -.810 | -.217 | | Sig. (2-tailed) | .960 | .460 |  | .252 | .398 | .861 | | N | 3 | 3 | 3 | 3 | 3 | 3 | | Phenol (Oblong variety) Agric Pawpaw | Pearson Correlation | .442 | .947 | -.923 | 1 | .974 | .577 | | Sig. (2-tailed) | .708 | .208 | .252 |  | .146 | .609 | | N | 3 | 3 | 3 | 3 | 3 | 3 | | Saponins (Oblong variety) Agric Pawpaw | Pearson Correlation | .635 | .995 | -.810 | .974 | 1 | .748 | | Sig. (2-tailed) | .562 | .062 | .398 | .146 |  | .462 | | N | 3 | 3 | 3 | 3 | 3 | 3 | | Alkaloids (Oblong variety) Agric Pawpaw | Pearson Correlation | .988 | .808 | -.217 | .577 | .748 | 1 | | Sig. (2-tailed) | .099 | .401 | .861 | .609 | .462 |  | | N | 3 | 3 | 3 | 3 | 3 | 3 |   *. Correlation is significant at the 0.05 level (2-tailed).  **Table 8:** Correlation matrix for Antioxidant activity and Phytochemical constituents in *Carica papaya* fruit (oblong variety: Agric Pawpaw) at the Ripe stage   | Correlation matrix for Antioxidant activity and Phytochemical constituents (Oblong variety)  Agric Pawpaw | | Antioxidant (Oblong variety) Agric Pawpaw | Tannins (Oblong variety) Agric Pawpaw | Flavonoids (Oblong variety) Agric Pawpaw | Phenol (Oblong variety) Agric Pawpaw | Saponins (Oblong variety) Agric Pawpaw | Alkaloids (Oblong variety) Agric Pawpaw | | --- | --- | --- | --- | --- | --- | --- | --- | | Antioxidant (Oblong variety) Agric Pawpaw | Pearson Correlation | 1 | .919 | -.097 | .735 | -.955 | .754 | | Sig. (2-tailed) |  | .258 | .938 | .475 | .192 | .456 | | N | 4 | 3 | 3 | 3 | 3 | 3 | | Tannins (Oblong variety) Agric Pawpaw | Pearson Correlation | .919 | 1 | -.481 | .408 | -.995 | .434 | | Sig. (2-tailed) | .258 |  | .680 | .733 | .066 | .714 | | N | 3 | 3 | 3 | 3 | 3 | 3 | | Flavonoids (Oblong variety) Agric Pawpaw | Pearson Correlation | -.097 | -.481 | 1 | .604 | .388 | .581 | | Sig. (2-tailed) | .938 | .680 |  | .587 | .746 | .606 | | N | 3 | 3 | 3 | 3 | 3 | 3 | | Phenol (Oblong variety) Agric Pawpaw | Pearson Correlation | .735 | .408 | .604 | 1 | -.500 | 1.000* | | Sig. (2-tailed) | .475 | .733 | .587 |  | .667 | .018 | | N | 3 | 3 | 3 | 3 | 3 | 3 | | Saponins (Oblong variety) Agric Pawpaw | Pearson Correlation | -.955 | -.995 | .388 | -.500 | 1 | -.525 | | Sig. (2-tailed) | .192 | .066 | .746 | .667 |  | .648 | | N | 3 | 3 | 3 | 3 | 3 | 3 | | Alkaloids (Oblong variety) Agric Pawpaw | Pearson Correlation | .754 | .434 | .581 | 1.000* | -.525 | 1 | | Sig. (2-tailed) | .456 | .714 | .606 | .018 | .648 |  | | N | 3 | 3 | 3 | 3 | 3 | 3 | | *. Correlation is significant at the 0.05 level (2-tailed). | | | | | | | | | | | | | | | |

**Table 9:** Correlation matrix for Antioxidant activity and Phytochemical constituents in *Carica papaya* fruit (oblong variety: Agric Pawpaw) at the Overripe stage

| Correlation matrix for Antioxidant activity and Phytochemical constituents (Oblong variety)  Agric Pawpaw | | Antioxidant (Oblong variety) Agric Pawpaw | Tannins (Oblong variety) Agric Pawpaw | Flavonoids (Oblong variety) Agric Pawpaw | Phenol (Oblong variety) Agric Pawpaw | Saponins (Oblong variety) Agric Pawpaw | Alkaloids (Oblong variety) Agric Pawpaw |
| --- | --- | --- | --- | --- | --- | --- | --- |
| Antioxidant (Oblong variety) Agric Pawpaw | Pearson Correlation | 1 | -.866 | .815 | .350 | -.594 | -.941 |
| Sig. (2-tailed) |  | .333 | .394 | .772 | .595 | .219 |
| N | 4 | 3 | 3 | 3 | 3 | 3 |
| Tannins (Oblong variety) Agric Pawpaw | Pearson Correlation | -.866 | 1 | -.995 | .165 | .917 | .984 |
| Sig. (2-tailed) | .333 |  | .061 | .894 | .262 | .114 |
| N | 3 | 3 | 3 | 3 | 3 | 3 |
| Flavonoids (Oblong variety) Agric Pawpaw | Pearson Correlation | .815 | -.995 | 1 | -.258 | -.951 | -.963 |
| Sig. (2-tailed) | .394 | .061 |  | .834 | .201 | .175 |
| N | 3 | 3 | 3 | 3 | 3 | 3 |
| Phenol (Oblong variety) Agric Pawpaw | Pearson Correlation | .350 | .165 | -.258 | 1 | .545 | -.013 |
| Sig. (2-tailed) | .772 | .894 | .834 |  | .633 | .991 |
| N | 3 | 3 | 3 | 3 | 3 | 3 |
| Saponins (Oblong variety) Agric Pawpaw | Pearson Correlation | -.594 | .917 | -.951 | .545 | 1 | .831 |
| Sig. (2-tailed) | .595 | .262 | .201 | .633 |  | .376 |
| N | 3 | 3 | 3 | 3 | 3 | 3 |
| Alkaloids (Oblong variety) Agric Pawpaw | Pearson Correlation | -.941 | .984 | -.963 | -.013 | .831 | 1 |
| Sig. (2-tailed) | .219 | .114 | .175 | .991 | .376 |  |
| N | 3 | 3 | 3 | 3 | 3 | 3 |

**Table 10:** Correlation matrix for Antioxidant activity and Phytochemical constituents in *Carica papaya* fruit (oblong variety: Agric Pawpaw) at various ripening stages (unripe, ripe and overripe)

| Correlation matrix for Antioxidant activity and Phytochemical constituents (Oblong variety)  Agric Pawpaw | | Antioxidant (Oblong variety) Agric Pawpaw | Tannins (Oblong variety) Agric Pawpaw | Flavonoids (Oblong variety) Agric Pawpaw | Phenol (Oblong variety) Agric Pawpaw | Saponins (Oblong variety) Agric Pawpaw | Alkaloids (Oblong variety) Agric Pawpaw |
| --- | --- | --- | --- | --- | --- | --- | --- |
| Antioxidant (Oblong variety) Agric Pawpaw | Pearson Correlation | 1 | -.831** | .852** | -.981** | .972** | .955** |
| Sig. (2-tailed) |  | .005 | .004 | .000 | .000 | .000 |
| N | 12 | 9 | 9 | 9 | 9 | 9 |
| Tannins (Oblong variety) Agric Pawpaw | Pearson Correlation | -.831** | 1 | -.909** | .900** | -.764* | -.697* |
| Sig. (2-tailed) | .005 |  | .001 | .001 | .016 | .037 |
| N | 9 | 9 | 9 | 9 | 9 | 9 |
| Flavonoids (Oblong variety) Agric Pawpaw | Pearson Correlation | .852** | -.909** | 1 | -.914** | .721* | .661 |
| Sig. (2-tailed) | .004 | .001 |  | .001 | .028 | .053 |
| N | 9 | 9 | 9 | 9 | 9 | 9 |
| Phenol (Oblong variety) Agric Pawpaw | Pearson Correlation | -.981** | .900** | -.914** | 1 | -.924** | -.896** |
| Sig. (2-tailed) | .000 | .001 | .001 |  | .000 | .001 |
| N | 9 | 9 | 9 | 9 | 9 | 9 |
| Saponins (Oblong variety) Agric Pawpaw | Pearson Correlation | .972** | -.764* | .721* | -.924** | 1 | .992** |
| Sig. (2-tailed) | .000 | .016 | .028 | .000 |  | .000 |
| N | 9 | 9 | 9 | 9 | 9 | 9 |
| Alkaloids (Oblong variety) Agric Pawpaw | Pearson Correlation | .955** | -.697* | .661 | -.896** | .992** | 1 |
| Sig. (2-tailed) | .000 | .037 | .053 | .001 | .000 |  |
| N | 9 | 9 | 9 | 9 | 9 | 9 |
| **. Correlation is significant at the 0.01 level (2-tailed). | | | | | | | |
| *. Correlation is significant at the 0.05 level (2-tailed). | | | | | | | |


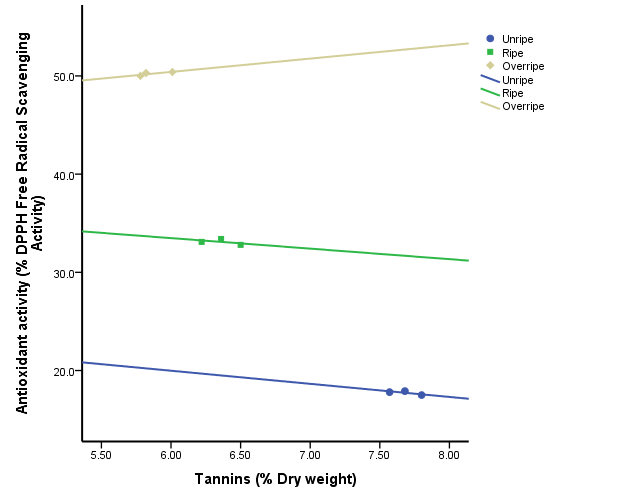


**Figure 5:** Correlation between Tannins and Antioxidant activity (DPPH free radical scavenging activity) of Carica papaya fruit (pear-shaped variety: ‘Local pawpaw’) at various ripening stages. Correlation coefficient, r = –0.738, –0.500 and 0.801; 99% confidence interval = –79.098 to 76.428, –119.204 to 117.061 and –63.141 to 65.857; Coefficient of determination, r2 = 0.544, 0.250 and 0.642 for the unripe, ripe and overripe respectively.


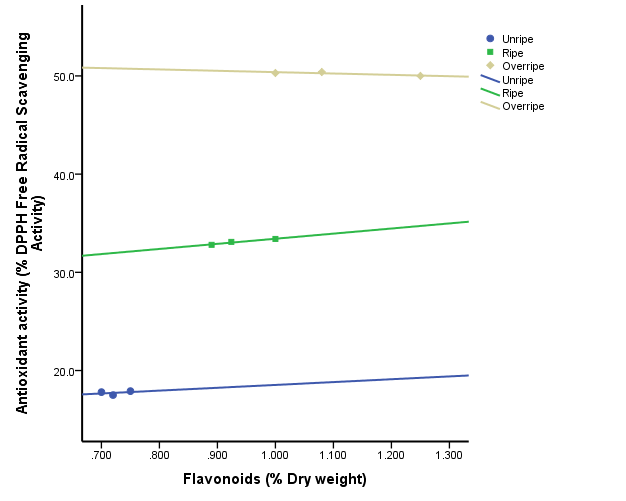


**Figure 6:** Correlation between Flavonoids and Antioxidant activity (DPPH free radical scavenging activity) of *Carica papaya* fruit (pear-shaped variety: ‘Local pawpaw’) at various ripening stages. Correlation coefficient, r = 0.350, 0.977 and –0.847; 99% confidence interval = –490.359 to 496.148, –67.793 to 78.196 and –56.621 to 53.861; Coefficient of determination, r2 = 0.122, 0.954 and 0.717 for the unripe, ripe and overripe respectively.


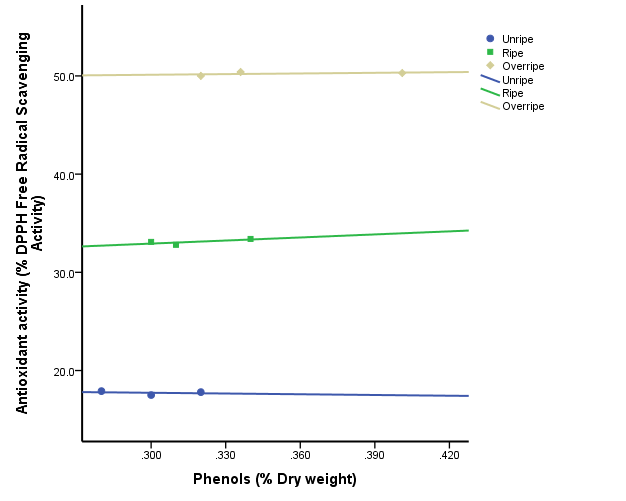


**Figure 7:** Correlation between Phenols and Antioxidant activity (DPPH free radical scavenging activity) of Carica papaya fruit (pear-shaped variety: ‘Local pawpaw’) at various ripening stages. Correlation coefficient, r = –0.240, 0.721 and 0.452; 99% confidence interval = –645.664 to 640.664, –625.712 to 646.481 and –273.400 to 277.783; Coefficient of determination, r2 = 0.058, 0.519 and 0.204 for the unripe, ripe and overripe respectively.


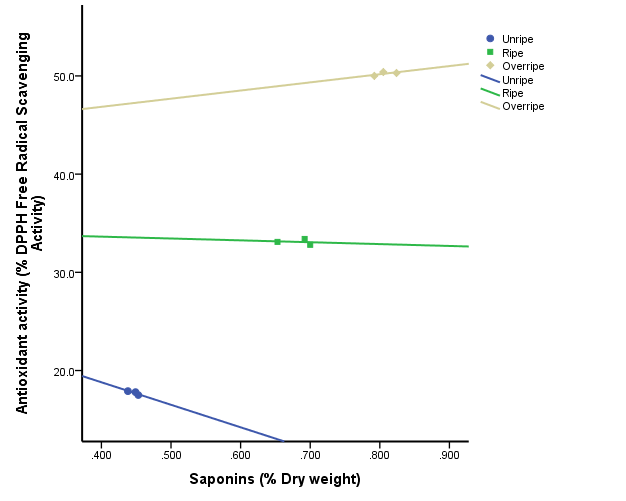


**Figure 8:** Correlation between Saponins and Antioxidant activity (DPPH free radical scavenging activity) of Carica papaya fruit (pear-shaped variety: ‘Local pawpaw’) at various ripening stages. Correlation coefficient, r = –0.856, –0.159 and 0.642; 99% confidence interval = –906.200 to 860.344, –751.667 to 747.871 and –623.156 to 639.759; Coefficient of determination, r2 = 0.732, 0.025 and 0.412 for the unripe, ripe and overripe respectively.


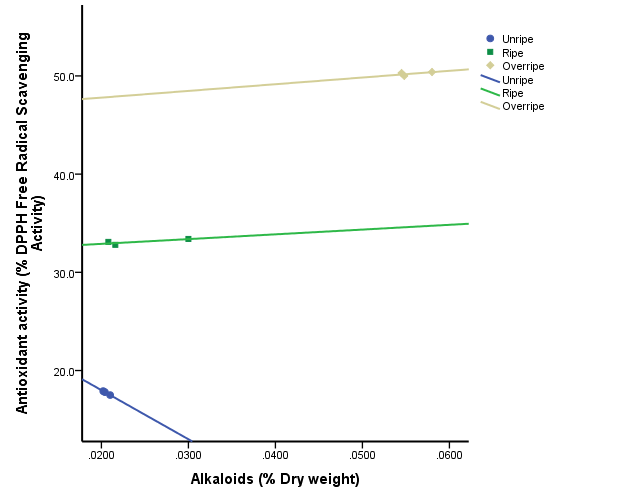


**Figure 9:** Correlation between Alkaloids and Antioxidant activity (DPPH free radical scavenging activity) of Carica papaya fruit (pear-shaped variety: ‘Local pawpaw’) at various ripening stages. Correlation coefficient, r = –1, 0.824 and 0.636; 99% confidence interval = –500.000 to –500.000, –2073.987 to 2171.010 and –5205.370 to 5341.774; Coefficient of determination, r2 = 1.000, 0.679 and 0.404 for the unripe, ripe and overripe respectively.


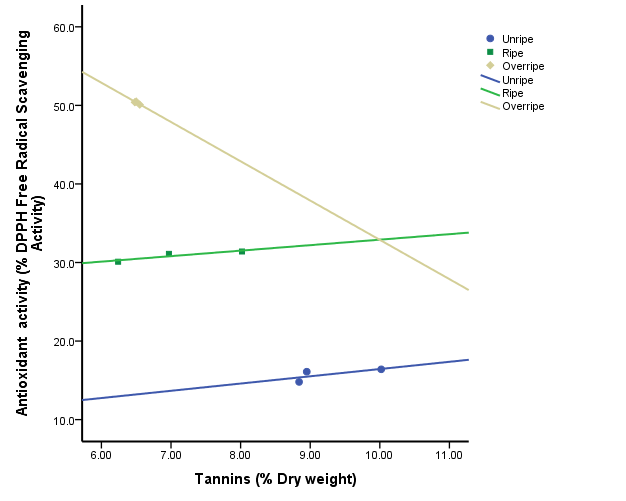


**Figure 10:** Correlation between Tannins and Antioxidant activity (DPPH free radical scavenging activity) of Carica papaya fruit (oblong variety: ‘Agric pawpaw’) at various ripening stages. Correlation coefficient, r = 0.707, 0.919 and –0.866; 99% confidence interval = –57.808 to 59.653, –18.374 to 19.772 and –188.761 to 178.761; Coefficient of determination, r2 = 0.500, 0.845 and 0.750 for the unripe, ripe and overripe respectively.


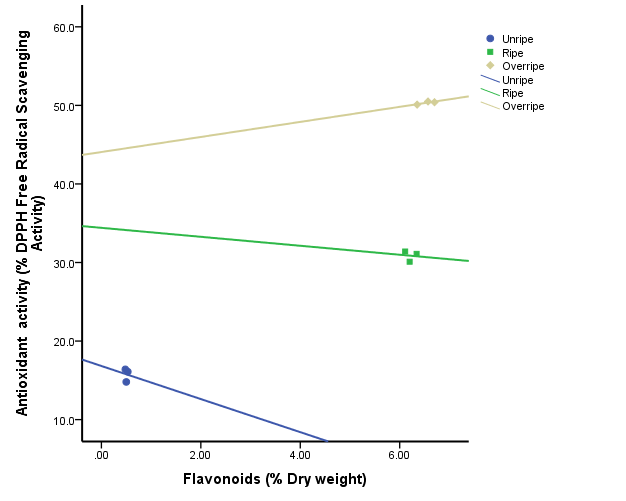


**Figure 11:** Correlation between Flavonoids and Antioxidant activity (DPPH free radical scavenging activity) of *Carica papaya* fruit (oblong variety: ‘Agric pawpaw’) at various ripening stages. Correlation coefficient, r = –0.062, –0.097 and 0.815; 99% confidence interval = –2149.210 to 2144.999, –372.653 to 371.511 and –42.487 to 44.404; Coefficient of determination, r2 = 0.004, 0.009 and 0.664 for the unripe, ripe and overripe respectively.


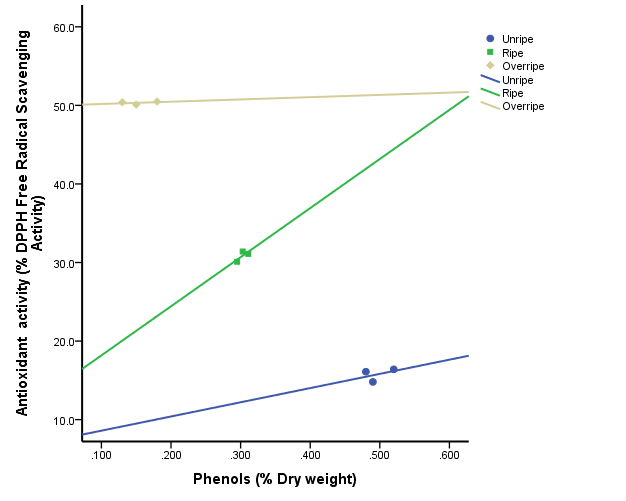


**Figure 12:** Correlation between Phenols and Antioxidant activity (DPPH free radical scavenging activity) of *Carica papaya* fruit (oblong variety: ‘Agric pawpaw’) at various ripening stages. Correlation coefficient, r = 0.442, 0.735 and 0.350; 99% confidence interval = –2314.277 to 2350.430, –3612.724 to 3737.724 and –490.359 to 496.148; Coefficient of determination, r2 = 0.196, 0.540 and 0.122 for the unripe, ripe and overripe respectively.


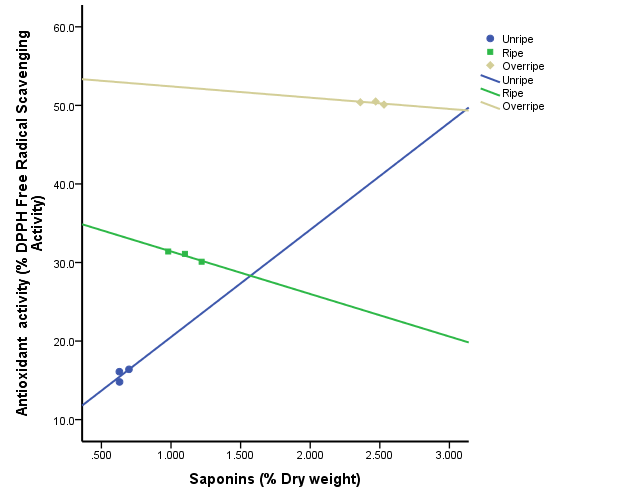


**Figure 13:** Correlation between Saponins and Antioxidant activity (DPPH free radical scavenging activity) of Carica papaya fruit (oblong variety: ‘Agric pawpaw’) at various ripening stages. Correlation coefficient, r = 0.635, –0.955 and –0.594; 99% confidence interval = –1043.565 to 1070.883, –112.611 to 101.777 and –125.041 to 122.171; Coefficient of determination, r2 = 0.403, 0.912 and 0.353 for the unripe, ripe and overripe respectively.


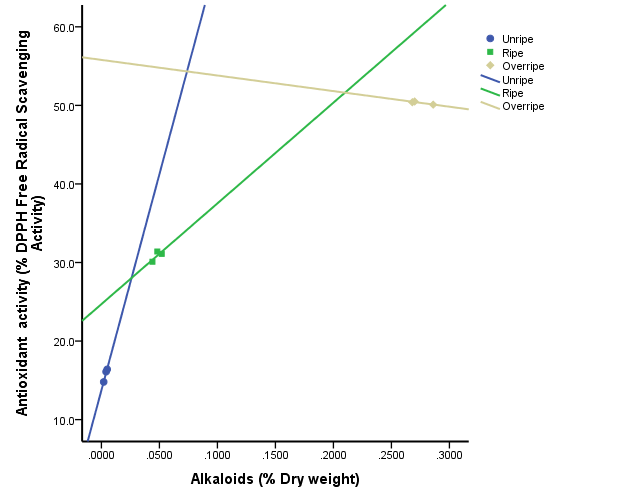


**Figure 14:** Correlation between Alkaloids and Antioxidant activity (DPPH free radical scavenging activity) of Carica papaya fruit (oblong variety: ‘Agric pawpaw’) at various ripening stages. Correlation coefficient, r = 0.988, 0.754 and –0.941; 99% confidence interval = –4962.835 to 6062.835, –6986.590 to 7243.043 and –472.973 to 433.247; Coefficient of determination, r2 = 0.976, 0.568 and 0.886 for the unripe, ripe and overripe respectively.

**APPENDIX II**

**FORMULAR FOR CALCULATING CONCENTRATION OF VARIOUS PARAMETER**

**DPPH scavenging activity (%)** = (Ablank –Asample) × 100.

Ablank

Where A is the absorbance.

**Phenols**

Weight of Sample used = 2g

Extract used = 5ml

Final volume of Extract = 100ml

Percentage = 100%

ASample – ABlank × Extract × 100%

Final Volume Weight of Sample used

**Alkaloids**

Weight of Sample used = 5g

Extract used = 5ml

Final volume of Extract = 200ml

Percentage = 100%

Extract × 100% × Reading (Final Weight – Initial Weight)

Final Volume Weight of Sample used

**Tannins**

Weight of Sample used = 5g

Extract used = 5ml

Final volume of Extract = 50ml

Percentage = 100%

ASample – ABlank × Extract × 100%

Final Volume Weight of Sample

**Saponins**

Weight of Sample used = 20g

Extract used = 40ml

Final volume of Extract = 300ml

Percentage = 100%

Extract × 100% × Reading (Final Weight – Initial Weight)

Final Volume Weight of Sample used

**Flavonoids**

Weight of Sample used = 10g

Extract used = 100ml

Final volume of Extract = 100ml

Percentage = 100%

Reading = Final Weight – Initial Weight

Extract × 100% × Reading (Final Weight – Initial Weight)

Final Volume Weight of Sample used
